# Supplementary material for: Quinone Pool, a Key Target of Plant Flavonoids Inhibiting Gram-Positive Bacteria
Source: Preprints.org preprint supplement (doi:10.20944/preprints202305.0807.v1), 2023-05-11
Supplement: Supplementary file 1 [file supplementary]

**Supplementary Materials**

Quinone pool, a key target of plant flavonoids inhibiting gram-positive bacteria

Li Zhang 1,2,†, Yu Yan 1,†, Jianping Zhu 2,†, Xuexue Xia 1, Ganjun Yuan 1,2,*, Shimin Li 2, Beibei Deng 2 and Xinrong Luo 2

1 Biotechnological Engineering Center for Pharmaceutical Research and Development, Jiangxi Agricultural University, Nanchang 330045, China; zhangli43012022@163.com (L.Z.); yanyu99668@163.com (Y.Y.); xiaxuexue007@163.com (X.X.)‬‬‬‬‬‬‬‬‬‬

2 Laboratory of Natural Medicine and Microbiological Drug, College of Bioscience and Bioengineering, Jiangxi Agricultural University, Nanchang 330045, China; zjp13698090160@163.com (J.Z.); zilong5716@163.com (S.L.); dengbeibei0412@163.com (B.D.); 17336624619@163.com (X.L.)

† Authors who have equal contributions for this work.

***** Correspondence: gyuan@jxau.edu.cn; Tel.: +86-0791-83813459

Figure S1. The HPLC-UV profiles of representative MK extract from *S. aureus* ATCC 25923.

Figure S1. The HPLC-UV profiles of representative MK extract from S. aureus ATCC 25923. **a**, the HPLC of profile of MK extarct; **b**, the UV spectroscopies of four peaks respectively at 4.944 (MK-4 as an internal standard), 8.363 (peak 1), 10.535 (peak 2) and 13.318 (peak 3).
